# Supplementary material for: Telephone-based Stop Smoking Service support: experiences, accessibility and health equity implications
Source: Research Square preprint supplement (doi:10.21203/rs.3.rs-6759845/v1), 2025-06-13
Supplement: Supplementary file 1 [file 167c5eef514b9df0e8a42ff4.docx]

## Supplemental Material 2: Qualitative Interviews: Sampling, Interview Schedule and Illustrative Quotes

### Service User Interviews: Sampling Strategy

101 participants were identified from survey data who had agreed to be contacted for a follow-up and expressed a preference for an online interview (the most popular answer).

72 people in total were invited to interview - everyone was contacted up to three times.

People who lived in the lower socio-economic deciles (1-4) **and** a member of one of the four groups (under eighteen while using service, pregnant, long-term physical health condition, mental health condition) were contacted first at the end of July 2023. People from subsequent deciles (4-10) were invited after low response rate. Two people declined to take part and asked not to be contacted again. Five people agreed to take part, did not attend and then did not respond to attempts to reschedule.

#### Participants:

SU Interview participant details are shown in the table below.

18 service users were interviewed in total, resulting in over 70,000 words of transcribed interviews.

Of these 18, 11 participants were female, 7 male.

None of the participants were under eighteen when they used the service, nor were any of them pregnant when they were using the service.

Six participants disclosed that they had a long-term physical health condition, fourteen disclosed that they had a long-term mental health condition.

All of the participants had used the telephone quitline at some point during their service use. Five participants had face to face sessions prior to moving to the phone service, and were able to offer comparisons and comments regarding the different types of provision. Two people explained they were given the option of modality and had chosen phone.

Nine participants had successfully quit smoking, with seven of them attributing their success to the service. Two were keen to emphasise they had quit smoking after their time with the service. Two people were still using the service at the time of the interview and were tapering using products. Seven people were current smokers, having relapsed since using the service, or never having managed to quit at all.

**Interview schedule**

**Stop Smoking Service - Interview Schedule**

**1. Could you begin by telling me a bit about yourself**

- The stop smoking service make different provisions for certain specialist groups.  These include people with a long term physical condition, a mental health condition, under 18’s and those who are pregnant.  Do/did any of these apply to you?
  - Under 18
  - Pregnant
  - Mental health condition
  - Long-term physical health condition
- Which local authority do you live in?
- Do you mind telling me, what is your highest level of education?

**2. Can you tell me about when you were using the service**

- When did you access the service?
- Why did you decide to use the service?
- Was that in-person or over the telephone?
- How long did you use the service for?
  - The full twelve weeks, or less
- When did you last access service?

**3. How did you find out about the service?**

- How easy was it to find information?
- Can you tell me about any challenges you experienced?
- How were you referred to the service? What was that procedure like?
- Did you have any expectations of what the service would be like?

**4. Did you attend all the sessions offered?**

- If not – can you tell me more about why not?
- Did you feel like there were enough sessions, would you have preferred more or less?

**5. Can you tell me about the advisor you had**

- What was it like talking to them about your quit attempt?
- Did you find them helpful? What in particular did you find helpful?
- Were they friendly? Were there any specific qualities you liked?

**6. Thinking about your conversations with your advisor, what were they like?**

- Did you feel heard?
- Did you feel that your advisor understood you?
- Did you feel supported by your advisor?
- Did the sessions feel scripted, or do you think they were more personal?
- Do you have any suggestions for improving this communication?

**7. Thinking specifically about the telephone service now - how was it having your appointments over the phone?**

- Any particular advantages or disadvantages for you?

**8. How easy was it to find the time to speak on the phone?**

**9. Were there any difficulties/ barriers with this?**

- Privacy at home
- Technology/ signal/ wifi etc
- Background distractions
- Any others?

**10. What do you think is lost or gained when the service is over the phone?**

- Did you feel like the personal touch was affected?
- What about practical things like carbon dioxide readings?

**11. Did you prefer the telephone service?**

- What kind of benefits did it offer you?
- Convenience with travel, timings, childcare etc
- Easier to talk to? Less pressure?
- Why were these important to you?

**12. How do you feel talking on the phone about these kinds of things?**

- Would it have been better in-person?

**13. What about video-calling? Would that appeal to you?**

- Are there any barriers or difficulties you would have with a virtual (videocall) service?
- Would there be any specific benefits/ preferences for this?
- How familiar are you with virtual services/ video tech etc?

**14. Would you recommend the service to a friend?**

- Why? Why not?
- Are there any specific aspects you would recommend?

**15. What do you want the service/ your advisor to know about your experiences?**

- What would you say to your advisor if they were here now?
- Is there anything they could have done differently to make your experience better?
- What other support would you have liked to receive?

**16. What would have to change for your experience to be better?**

- Can you provide specific examples of what should change?

**17. What does your ideal service look like?**

**Ending - Is there anything else you would like to tell me about your experiences with the service? Is there anything else you think I should have asked?**

- Send debrief sheet

**Service User Interviews - Participant Characteristics**

| **ID** | **Pregnant** | **Phys Health Cond** | **Mental Health Cond** | **Borough** | **Highest level education** | **Smoking Status (at time of interview)** | **Modality received** |
| --- | --- | --- | --- | --- | --- | --- | --- |
| SU1 | N | N | N | Central Bedfordshire | University | Quit due to service | Phone |
| SU2 | N | N | Y | Bedfordshire | L3 Diploma | Currently using service, quit attempt ongoing | Both phone an in-person |
| SU3 | N | N | N | Bedford | University (current) | Quit but after using service | Phone |
| SU4 | N | N | Y | Bedford | College | Still smoking | Phone |
| SU5 | N | N | Y | Central Bedfordshire | Apprenticeship/ HNC | Quit due to service | Phone |
| SU6 | N | N | Y | Bedfordshire | Undergrad | Quit | Phone |
| SU7 | N | N | Y | Central Bedfordshire | Wasn’t asked | Vaping but on 0mg | Requested over the phone |
| SU8 | N | N | Y | Central Bedfordshire | Postgrad | Quit | Two in-person, then phone after |
| SU9 | N | Y | N | Milton Keynes | Secondary school | Quit due to service | Phone |
| SU10 | N | N | N | Milton Keynes | A Levels | Still smoking | Phone |
| SU11 | N | N | Y | Milton Keynes | GCSEs | Quit due to service | Requested over the phone |
| SU12 | N | N | Y | Milton Keynes | Prof Qualification | Quit by herself | Phone |
| SU13 | N | Y | Y | Buckinghamshire/ Beds | Foundation Degree | Still smoking | Phone |
| SU14 | N | Y | Y | Bedfordshire | Degree | Quit due to service | Phone |
| SU15 | N | Y | Y | Milton Keynes | Bachelor’s Degree | Still smoking | Both |
| SU16 | N | Y | Y | Bedford Borough | University | Still smoking | Both |
| SU17 | N | Y | Y | Buckinghamshire | A Levels | Still smoking | Both |
| SU18 | N | N | Y | Bedford | GCSEs | Still smoking | Phone |

### Service provider: participants

| **PIN** | **Role** | **Interview length** |
| --- | --- | --- |
| S1 | Stop Smoking Advisor – core service | 34.48 mins |
| S2 | Stop Smoking Advisor – core service | 47.45 mins |
| S3 | Practitioner for tobacco control/previously Stop Smoking Advisor – core service | 48.20 mins |
| S4 | Public health professional/ previously Stop Smoking Advisor – core service | 51.29 mins |
| S5 | Stop Smoking Advisor – core service | 25.12 mins |
| S6 | Stop Smoking Advisor – core service | 50.45 mins |
| S7 | Care Coordinator – primary care | 35.59 mins |

### Illustrative Quotes from Service Users and Providers

|  | **Theme 1: What is gained and lost from TS?** |
| --- | --- |
| Service-users | *There’s no way I would have gone to a face-to-face because I couldn’t take that much time out of my working day. But, to give time up for a phone call, I could do that (SU5)*  *I think it’s that human contact that’s lost a little bit, someone who can really try and talk you into the mind frame you need to quit, because on the phone you’re just ... attention, but when you’re on the phone you can just sit there with the phone on loudspeaker and sit there looking at Facebook or playing games, you won’t listen, but when you’re with someone you have no choice but to pay attention to what they’re saying and listen to them (SU2)* |
| Staff | *Obviously, I have a family like lots of the advisors, so it’s difficult to have all different people at all different areas till eight/nine o'clock at night and then having to travel home. They’ve got children; they’ve got families. With telephone, you can do it at home with the children: you don’t have to have childcare (SP3)*  *It’s also convenient for me, just think about less carbon footprint of travelling somewhere, also not standing in the traffic for very long. I think I’m more focused, I’m more energetic, I can give more attention to the client. (SP6)*  *Personal contact [is lost] of course. When you talk face to face with someone, you can hear their emotions, you can hear where they are more reluctant, [and you can] avoid some answers or questions. But with telephone support you can’t see all this. So, personal contact, it’s all dead (SP1)* |

|  | **Theme 2: Choice and Control** |
| --- | --- |
| Service-users | *I’ve a habit that I had no control over for however long and I guess it’s quite deflating really because I’d quit quite a few times before and one way or another, I’d picked up again and it’s quite disheartening to let yourself down constantly. And so having some control over getting it back makes up for that lack of control that you’ve had smoking. As soon as your body says you need a cigarette, your mind doesn’t really have any power anymore, you kind of just need to follow the urge, so, being able to have some control makes it more rewarding to succeed (SU6)*  *I requested over the phone; it was easier for it to be on the phone than in person (SU11)* |
| Staff | *An ideal service should accommodate the needs of those who need the service most and under-served. So I guess we have an element of that in our service, we provide dual therapy for these groups. Obviously for pregnant women that initial appointment is 45 minutes rather than half an hour, but for those groups, especially the areas where the smoking prevalence is quite high I would have face-to-face clinic options available there, they don’t necessarily need to take up that offer, and clinic support overall and telephone support overall for the other clients. I would give them the choice, those specialist groups, those areas, I will give them the choice of face-to-face clinic or telephone support clinic (SP6)*  *I think the majority of support should be face to face and where somebody doesn’t attend then you convert to telephone support because a lot of the time people don’t turn up again because they’re embarrassed, and then telephone support does become a good thing because they haven’t got to face you with it … the choice is better for them, can you come in each week, do you want to come in every other week, would you like me to ring you (SP7)*  *Back then it was like ‘When do you want to come and see us at a clinic? What area do you live in? We need to find you a clinic in your area?’ Whereas now because it’s telephone it doesn’t matter, every client has the option of going to almost every clinic because the clinics aren’t local based: they can just be on the phone. So, you could have someone in Dunstable speaking to anyone on the phone, even if the advisor is in Milton Keynes or somewhere (SP4)* |

|  | **Theme 3: The active ingredients in quitting** |
| --- | --- |
| Service-users | *I think it was more natural. I seem to recall quite a lot of open questions about my lifestyle, what I’d been doing, how I’d overcome any cravings that I’d had and offering any help or tips about how to basically wean myself off of the cessation products, so yes, it did feel natural and intuitive, not scripted (SU8)*  *…it was just the fact of knowing that I had that phone call coming, I think. So, I don’t know – it sounds quite childish to say ‘Didn't want to disappoint’ or something. But you just didn't want to let yourself down and somebody else down, I’m guessing, in your subconscious, I would think (SU5)* |
| Staff | *When I used to have people come in to see me, I would get to know who they were as a person more. And you can get that a little bit over the phone, but it takes a lot of communication skills to do that (SP3)*  *Knowing well the products, empathy to people who call us and we call them, good practice, being professional, having a good telephone manner, managing situations like in really difficult situations when people are maybe not very polite, not happy with anything and not necessarily with myself or others. So being professional answering questions, being competent, knowing what you are doing (SP2)*  *It’s the rapport with the client straightaway, you’re not going to gel with absolutely everybody, that’s an impossibility, and non-judgemental, people are already coming to a Stop Smoking Service, they’re all a bit humble anyway because they know they shouldn’t be smoking, especially if they’ve got COPD or they’re pregnant, so you don’t need to make that situation worse, you just need to give the reassurance that you can do this (SP4)* |
