# Supplementary material for: Telephone-based Stop Smoking Service support: experiences, accessibility and health equity implications
Source: Research Square preprint supplement (doi:10.21203/rs.3.rs-6759845/v1), 2025-06-13
Supplement: Supplementary file 2 [file 753f75cc426c07f717ed6053.xlsx]

## Sheet: Sheet1
			Mean rankings for each method of delivery
	Individual F2F	Individual tel	Group F2F	Individual live video chat	Group live video chat	Online web chat	Wattsapp
Specialist Groups	5.42	5.58	3.71	4.15	2.64	3.2	3.51
Non-specialist Groups	5.9	5.5	4.04	4.19	2.77	2.81	2.81
Service Providers	6.52	6.22	4.23	4.01	2.78		2.74
