# Supplementary material for: Telephone-based Stop Smoking Service support: experiences, accessibility and health equity implications
Source: Research Square preprint supplement (doi:10.21203/rs.3.rs-6759845/v1), 2025-06-13
Supplement: Supplementary file 3 [file 9855f181becd5571c58f9d3e.docx]

# Supplemental Material 1: Quarterly Return Data and Quit Rates

Data were available for N=18,956 episodes from three time periods:

1. Prior to the re-model (F2F for all clients): from April 2017 to end of March 2019; N=9402 episodes
2. During the re-model (F2F for specialist groups; TS for all others): from April 2019 to end of March 2020; N=3950 episodes
3. During the Covid-19 pandemic (TS for all): From April 202 to end of March 2022; N=5604 episodes

Fig a) shows quit rates across the three time periods comparing the 20% most deprived (quintile 1) versus other smokers. Fig b) shows quit rates for specialist versus non-specialist groups during the re-model vs. during the pandemic (note data only available from 2019).

Quit rates for all groups were lower during the Covid-19 pandemic, when all clients received TS, and highest during the re-model period, when F2F support was only offered to specialist groups. However, we cannot conclude that the lower quit rates during the pandemic were due to the switch to TS since non-specialist groups received TS during the remodel. Lower quit rates may be due to other factors associated with the pandemic, and/or with the lack of Varenicline which was unavailable from October 2021.

**Fig a): Quit rates across the three time periods for the 20% most deprived (quintile 1) versus all other smokers**

**Fig b): Quit rates across two time periods for non-specialist vs. specialist groups**
