# Supplementary material for: Telephone-based Stop Smoking Service support: experiences, accessibility and health equity implications
Source: Research Square preprint supplement (doi:10.21203/rs.3.rs-6759845/v1), 2025-06-13
Supplement: Supplementary file 4 [file b6532fa2b1229d0df75d9e22.docx]

**Supplemental Material 5: Table showing top three advantages of face-to-face, telephone and online delivery for service users and providers**

|  |  | Face-to-Face | Telephone | Online |
| --- | --- | --- | --- | --- |
| Service Users | Advantage 1 | Personal human contact and relationship building | Convenience, ease and flexibility | Convenience, ease and flexibility |
|  | Advantage 2 | Motivational | Helpful | Personal, seeing the person you’re speaking with |
|  | Advantage 3 | Accountability | Less anxiety and embarrassment | Support and motivation |
| Service Providers | Advantage 1 | Capacity to do CO2 readings and physical tests | Convenience and Flexibility | Rapport building and body language |
|  | Advantage 2 | Body language and rapport |  | Best of both worlds |
|  | Advantage 3 | Greater engagement |  |  |
| Service Users | Disadvantage 1 | Travel and location | Impersonal | Technological issues |
|  | Disadvantage 2 | Time and inconvenience | Communication problems | Anxiety and embarrassment |
|  | Disadvantage 3 | Anxiety and embarrassment | Less rapport and support | Difficulty finding time and space |
| Service Providers | Disadvantage 1 | Less convenient / more effort | Lack of rapport | Technical issues / unable to use tech |
|  | Disadvantage 2 | Clients not attending | Less accountability / not answering calls | More hassle and less personal |
|  | Disadvantage 3 |  | No CO2 readings |  |

*Owing to the small number of service providers completing the questionnaire (N=23), in some cases, only 1 or 2 advantages/disadvantages were adequately represented.*
