# Supplementary material for: Telephone-based Stop Smoking Service support: experiences, accessibility and health equity implications
Source: Research Square preprint supplement (doi:10.21203/rs.3.rs-6759845/v1), 2025-06-13
Supplement: Supplementary file 5 [file e37eb8b2be672aef5fe09ad2.docx]

### Supplemental Material 3: Cost Effectiveness Methods and Treatment of Missing Data

### Micro-costing

The usage of smoking cessation services for each participant, including consultations with advisers and the distribution of pharmacotherapy and e-cigarettes, was systematically recorded. For smoking cessation consultations, the mode of delivery, the number of sessions and the duration of each session were documented. The staff costs for all successfully attended consultation sessions were estimated by multiplying the time spent by the unit cost of staff time, which included the salary of the person conducting the session, their salary on-costs and corresponding overheads. The unit cost of healthcare assistants from GP practices and pharmacists was derived from the published unit costs of health and social care, while the unit cost of smoking cessation advisers was provided by the SSS (1). For unattended sessions, an average of 10 minutes was allocated for updating notes and rescheduling another session. Additionally, face-to-face sessions incurred extra costs for travel and venue hire, based on the local rates of each site.

The second cost component was smoking cessation products distributed to participants, including nicotine replacement therapies (NRT), Zyban (bupropion), Champix (varenicline) and e-cigarettes. A wide range of NRT products were provided to participants, including chewing gum, inhalators, lozenges, microtabs, mouth spray, nasal spray and nicotine patches. The quantity of each product received by each participant was multiplied by the corresponding unit cost derived from the prescription cost analysis for England (2). The usage and costs of e-cigarettes were extracted from the study records. The overall costs for consultations, medication and e-cigarettes were then summed to compute the total smoking cessation costs throughout the episode.

### Missing data

A small proportion of episodes (596 out of 8,888) had missing values for consultation sessions and medication use. The majority – 558 (94%) – of these records with missing values were from outside the core SSS, namely GP practices or pharmacies. The cost analysis in this study was conducted based on an imputed dataset, where missing cost data were imputed using Rubin’s multiple imputation method (3). Multiple imputation by chained equations was performed to impute missing outcomes with 30 imputations. The imputation model incorporated a broad range of variables that were either related to the missing data or to the cost itself (4).

### References:

1. Jones K, Weatherly H. Unit Costs of Health & Social Care 2021. Personal Social Services Research Unit University of Kent; 2021.
2. NHS Business Services Authority 2021. Prescription Cost Analysis – England 2020/21. 10 June 2021 ed.
3. Efron BTR. An introduction to the bootstrap. Monographs on statistics and applied probability, New York, Chapman & Hall. 1993.
4. Faria R, Gomes M, Epstein D, White IR.. A guide to handling missing data in cost-effectiveness analysis conducted within randomised controlled trials. Pharmacoeconomics. 2014; 32: 1157-70.
